## Infratentorial Morphometry and Deep Brain Stimulation Outcome in Cervical Dystonia

Author names:

Luke Andrews; MSc\* <sup>[1,2]</sup>, Simon S. Keller; PhD <sup>[1]</sup>, Jibril Osman-Farah; MD <sup>[2]</sup>,  
Maneesh Bhojak; MD <sup>[2]</sup>, Antonella Macerollo; MD, PhD <sup>[1,2]</sup>

Author affiliations:

[1] The Department of Pharmacology and Therapeutics, Institute of Systems, Molecular and Integrative Biology, University of Liverpool, UK; [2] The Walton Centre NHS Foundation Trust, Liverpool, UK

Withdrawal statement:

The corresponding author (LA) has withdrawn their manuscript owing to inaccuracies in the data analysis and subsequent conclusions. Therefore, the authors do not wish this work to be cited as reference for the project. If you have any questions, please contact the corresponding author.
